# Supplementary material
Source: publisher site journal article supplement (https://www.dovepress.com/article/320248)
Supplement: Supplementary file 1 [file get_supplementary_file.php]

**Table S1**

The results of hypothesis testing by calculation of 95% conﬁdence intervals after subgroup analyses by gender.

| **Pollutants** | **Lag days** | **Male VS Female** | | |  |
| --- | --- | --- | --- | --- | --- |
| **Estimates** | **Lower limits** | **Upper limits** | **Z** |
| PM10 | Lag0 | -0.199 | -0.609 | 0.211 | -0.951 |
| Lag1 | -0.214 | -0.616 | 0.188 | -1.042 |
| Lag2 | -0.317 | -0.708 | 0.074 | -1.589 |
| Lag3 | -0.186 | -0.579 | 0.207 | -0.928 |
| Lag4 | -0.237 | -0.641 | 0.167 | -1.150 |
| Lag5 | -0.296 | -0.706 | 0.115 | -1.411 |
| Lag6 | -0.322 | -0.727 | 0.084 | -1.556 |
| Lag7 | -0.163 | -0.582 | 0.256 | -0.763 |
| Lag0-1 | -0.269 | -0.732 | 0.194 | -1.139 |
| Lag0-2 | -0.388 | -0.893 | 0.117 | -1.506 |
| Lag0-3 | -0.420 | -0.965 | 0.125 | -1.510 |
| Lag0-4 | -0.480 | -1.064 | 0.104 | -1.611 |
| Lag0-5 | -0.601 | -1.236 | 0.034 | -1.855 |
| Lag0-6 | -0.731* | -1.413 | -0.049 | -2.100 |
| Lag0-7 | -0.785* | -1.480 | -0.090 | -2.215 |
| SO2 | Lag0 | -0.239 | -2.046 | 1.568 | -0.259 |
| Lag1 | 1.307 | -0.521 | 3.135 | 1.401 |
| Lag2 | -0.333 | -2.142 | 1.475 | -0.361 |
| Lag3 | 0.318 | -1.483 | 2.119 | 0.346 |
| Lag4 | 0.145 | -1.637 | 1.927 | 0.160 |
| Lag5 | -0.226 | -2.058 | 1.606 | -0.241 |
| Lag6 | -1.885* | -3.725 | -0.045 | -2.007 |
| Lag7 | -1.441 | -3.267 | 0.385 | -1.546 |
| Lag0-1 | 0.647 | -1.434 | 2.728 | 0.609 |
| Lag0-2 | 0.295 | -1.987 | 2.577 | 0.253 |
| Lag0-3 | 0.430 | -2.028 | 2.888 | 0.343 |
| Lag0-4 | 0.460 | -2.179 | 3.099 | 0.342 |
| Lag0-5 | 0.360 | -2.485 | 3.205 | 0.248 |
| Lag0-6 | -0.390 | -3.443 | 2.663 | -0.250 |
| Lag0-7 | -1.037 | -4.267 | 2.193 | -0.629 |
| NO2 | Lag0 | 0.490 | -1.917 | 2.897 | 0.399 |
| Lag1 | 1.230 | -1.159 | 3.619 | 1.009 |
| Lag2 | 0.230 | -2.084 | 2.544 | 0.195 |
| Lag3 | 0.950 | -1.347 | 3.247 | 0.811 |
| Lag4 | 1.569 | -0.715 | 3.853 | 1.347 |
| Lag5 | 0.117 | -2.207 | 2.441 | 0.099 |
| Lag6 | -1.056 | -3.354 | 1.242 | -0.901 |
| Lag7 | -1.864 | -4.187 | 0.459 | -1.573 |
| Lag0-1 | 1.090 | -1.639 | 3.819 | 0.783 |
| Lag0-2 | 1.060 | -1.919 | 4.039 | 0.698 |
| Lag0-3 | 1.370 | -1.839 | 4.579 | 0.837 |
| Lag0-4 | 1.950 | -1.471 | 5.371 | 1.117 |
| Lag0-5 | 1.860 | -1.812 | 5.532 | 0.993 |
| Lag0-6 | 1.320 | -2.569 | 5.209 | 0.665 |
| Lag0-7 | 0.600 | -3.491 | 4.691 | 0.287 |

**P*<0.05
